# Supplementary material
Source: PubMed Central journal article supplement (PMC7960379)
Supplement: 16-01071.pdf [file 16-01071.pdf]

**On-line Table 1: Multidetector row CT of the face protocols**

| Parameter                                                   | 16 MDCT              | 40/64 MDCT           |
|-------------------------------------------------------------|----------------------|----------------------|
| Arm positioning                                             | Adducted             | Adducted             |
| Collimation                                                 | 16 × 0.75            | 40/64 × 0.625        |
| Pitch                                                       | 0.9                  | 0.67                 |
| Rotation time (seconds)                                     | 0.75                 | 0.5                  |
| Kilovoltage                                                 | 120                  | 120                  |
| Milliamperage                                               | 245                  | 400/350              |
| Contrast material                                           | Iohexol              | Iohexol              |
| Volume (mL) <sup>a</sup>                                    | 100                  | 100                  |
| Injection rate (mL/s) <sup>b</sup>                          | 4                    | 4                    |
| Reconstruction filter                                       | Soft tissue and bone | Soft tissue and bone |
| Axial images (thickness × interval) (mm)                    | 1 × 0.5              | 1 × 0.5              |
| Sagittal and coronal MPR images (thickness × interval) (mm) | 2 × 2                | 2 × 2                |

**Note:**—MDCT indicates multidetector row CT.

<sup>a</sup> Three hundred milligrams of iodine per milliliter.

<sup>b</sup> Contrast material injection followed by a 50-mL saline push injected at a rate of 4 mL/s.

**On-line Table 2: Correlation between categoric predictor variables and visual acuity at 1 month and the interobserver agreement between the 2 radiologists in identifying the CT findings**

| Variable                                | No. of Globes with Variable | Presence of Variable  |                                                      |                       | Absence of Variable                                  |                     |                     | P Value |                   | K (95% CI) |
|-----------------------------------------|-----------------------------|-----------------------|------------------------------------------------------|-----------------------|------------------------------------------------------|---------------------|---------------------|---------|-------------------|------------|
|                                         |                             | Mean VA (logMAR) (SE) | Median VA (logMAR) (Q <sub>1</sub> -Q <sub>3</sub> ) | Mean VA (logMAR) (SE) | Median VA (logMAR) (Q <sub>1</sub> -Q <sub>3</sub> ) | Welch Test          | Wilcoxon Test       |         |                   |            |
| Male                                    | 72/97                       | -3.38 (0.2)           | -4.7 (-4.7-2.7)                                      | -3.91 (0.33)          | -4.7 (-4.7-3.2)                                      | .1                  | .13                 | *       |                   |            |
| Female                                  | 25/97                       | -3.91 (0.33)          | -4.7 (-4.7-3.2)                                      | -3.38 (0.2)           | -4.7 (-4.7-2.7)                                      |                     |                     | *       |                   |            |
| IOP value                               | 29/97                       | -3.38 (0.31)          | -4.2 (-4.7-2.7)                                      | -3.58 (0.2)           | -4.7 (-4.7-2.7)                                      | .5                  | .5                  | *       |                   |            |
| Blunt trauma                            | 43/82                       | -3.51 (0.25)          | -4.7 (-4.7-2.7)                                      | -3.78 (0.26)          | -4.7 (-4.7-3.7)                                      | .47                 | .36                 | *       |                   |            |
| Stabs/sharp objects                     | 15/82                       | -2.6 (0.4)            | -2.7 (-4.7-0.4)                                      | -3.87 (0.19)          | -4.7 (-4.7-3.7)                                      | .03 <sup>a</sup>    | .005 <sup>a</sup>   | *       |                   |            |
| GSW                                     | 24/82                       | -4.5 (0.3)            | -4.7 (-4.7-4.7)                                      | -3.28 (0.2)           | -4.2 (-4.7-1.4)                                      | <.0001 <sup>a</sup> | .0008 <sup>a</sup>  | *       |                   |            |
| Perforating injury                      | 16/24                       | -4.63 (0.19)          | -4.7 (-4.7-4.7)                                      | -4.23 (0.27)          | -4.7 (-4.7-4.7)                                      | .42                 | .6                  |         | 0.46 (0.13-1)     |            |
| Presenting VA                           | 59/97                       | -3.05 (0.2)           | -3.7 (-4.7-1.3)                                      | -4.2 (0.25)           | -4.7 (-4.7-4.7)                                      | .0002 <sup>a</sup>  | .0004 <sup>a</sup>  | *       |                   |            |
| RAPD tested                             | 41/97                       | -3.1 (0.26)           | -3.7 (-4.7-1)                                        | -3.78 (0.22)          | -4.7 (-4.7-2.7)                                      | .06                 | .06                 | *       |                   |            |
| RAPD                                    | 19/41                       | -3.89 (0.39)          | -4.7 (-4.7-2.7)                                      | -2.4 (0.36)           | -2.7 (-4.7-0.375)                                    | .008 <sup>a</sup>   | .007 <sup>a</sup>   | *       |                   |            |
| Posterior segment hemorrhage            | 70/85                       | -4.3 (0.12)           | -4.7 (-4.7-4.7)                                      | -1.11 (0.26)          | -0.48 (-1.4-0.3)                                     | <.0001 <sup>a</sup> | <.0001 <sup>a</sup> |         | 0.64 (0.53-0.74)  |            |
| Posterior segment hemorrhage, grade I   | 14/70                       | -3.32 (0.42)          | -3.7 (-4.7-2.7)                                      | -3.82 (0.18)          | -4.7 (-4.7-3.7)                                      | .26                 | .032                |         | 0.54 (0.34-0.74)  |            |
| Posterior segment hemorrhage, grade II  | 7/70                        | -3.8 (0.6)            | -4.7 (-4.7-2.7)                                      | -3.73 (0.18)          | -4.7 (-4.7-2.7)                                      | .9                  | .79                 |         | 0.32 (0.1-0.53)   |            |
| Posterior segment hemorrhage, grade III | 49/70                       | -4.6 (0.16)           | -4.7 (-4.7-4.7)                                      | -2.49 (0.19)          | -2.7 (-4.7-0.53)                                     | <.0001 <sup>a</sup> | <.0001 <sup>a</sup> |         | 0.79 (0.68-0.9)   |            |
| HypHEMA                                 | 59/85                       | -4.39 (0.16)          | -4.7 (-4.7-4.7)                                      | -2.26 (0.24)          | -2.05 (-4.7-0.48)                                    | <.0001 <sup>a</sup> | <.0001 <sup>a</sup> |         | 0.57 (0.4-0.73)   |            |
| Intraorbital hemorrhage                 | 62/85                       | -4.28 (0.16)          | -4.7 (-4.7-4.7)                                      | -2.27 (0.27)          | -1.4 (-4.7-0.48)                                     | <.0001 <sup>a</sup> | <.0001 <sup>a</sup> |         | 0.48 (0.31-0.65)  |            |
| Extraconal hemorrhage                   | 61/85                       | -4.3 (0.16)           | -4.7 (-4.7-4.7)                                      | -2.28 (0.26)          | -2.05 (-4.7-0.48)                                    | <.0001 <sup>a</sup> | <.0001 <sup>a</sup> |         | 0.57 (0.44-0.71)  |            |
| Intraconal hemorrhage                   | 40/85                       | -4.46 (0.22)          | -4.7 (-4.7-4.7)                                      | -3.09 (0.21)          | -4.7 (-4.7-1.04)                                     | <.0001 <sup>a</sup> | .0002 <sup>a</sup>  |         | 0.82 (0.71-0.92)  |            |
| Extraconal emphysema                    | 37/85                       | -4.51 (0.23)          | -4.7 (-4.7-4.7)                                      | -3.14 (0.2)           | -4.2 (-4.7-1.14)                                     | <.0001 <sup>a</sup> | .0002 <sup>a</sup>  |         | 0.82 (0.72-0.92)  |            |
| Intraconal emphysema                    | 37/85                       | -4.63 (0.4)           | -4.7 (-4.7-4.7)                                      | -3.55 (0.18)          | -4.2 (-4.7-1.14)                                     | <.0001 <sup>a</sup> | .014 <sup>a</sup>   |         | 0.79 (0.65-0.93)  |            |
| Intraocular gas                         | 22/85                       | -4.56 (0.32)          | -4.7 (-4.7-4.7)                                      | -3.45 (0.19)          | -4.7 (-4.7-2.7)                                      | <.0001 <sup>a</sup> | .0042 <sup>a</sup>  |         | 0.8 (0.67-0.92)   |            |
| Visible lens                            | 33/85                       | -3.08 (0.26)          | -4.7 (-4.7-0.85)                                     | -4.16 (0.2)           | -4.7 (-4.7-4.7)                                      | .0054 <sup>a</sup>  | .0058 <sup>a</sup>  |         | 0.72 (0.59-0.84)  |            |
| Lens subluxation                        | 7/33                        | -4.27 (0.69)          | -4.7 (-4.7-3.7)                                      | -2.58 (0.35)          | -2.7 (-4.7-0.48)                                     | .0018 <sup>a</sup>  | .06 <sup>a</sup>    |         | 0.12 (-0.11-0.37) |            |
| Lens dislocation                        | 3/33                        | -2.83 (1.13)          | -2.7 (-4.7-1.09)                                     | -2.94 (0.35)          | -3.7 (-4.7-0.48)                                     | .92                 | .97                 |         | 0.48 (0.17-0.79)  |            |
| Traumatic cataract                      | 7/33                        | -2.94 (0.74)          | -2.7 (-4.7-1.09)                                     | -2.92 (0.39)          | -3.7 (-4.7-0.48)                                     | .98                 | 1                   |         | 0.23 (0.02-0.44)  |            |
| Orbital fracture                        | 46/85                       | -4.37 (0.21)          | -4.7 (-4.7-4.7)                                      | -2.99 (0.2)           | -3.7 (-4.7-1)                                        | <.0001 <sup>a</sup> | <.0001 <sup>a</sup> |         | 0.77 (0.66-0.88)  |            |
| Simple facial fracture                  | 16/85                       | -4.22 (0.39)          | -4.7 (-4.7-4.7)                                      | -3.63 (0.19)          | -4.7 (-4.7-2.7)                                      | .12                 | .17                 |         | 0.39 (0.19-0.59)  |            |
| Complex facial fractures                | 32/85                       | -4.47 (0.26)          | -4.7 (-4.7-4.7)                                      | -3.3 (0.2)            | -4.7 (-4.7-1.35)                                     | <.0001 <sup>a</sup> | .00 <sup>a</sup>    |         | 0.8 (0.69-0.91)   |            |
| IOFB                                    | 13/85                       | -3.9 (0.44)           | -4.7 (-4.7-4.2)                                      | -3.71 (0.18)          | -4.7 (-4.7-2.7)                                      | .72                 | .54                 |         | 0.8 (0.65-0.94)   |            |
| Deep anterior chamber                   | 3 of 26                     | -2.47 (1)             | -2.35 (-4.45-0.6)                                    | -3 (0.34)             | -3.7 (-4.7-0.7)                                      | .61                 | .6                  |         | 0.65 (0.51-0.79)  |            |
| Normal anterior chamber                 | 6 of 26                     | -2.44 (0.87)          | -2.7 (-4.7-0.01)                                     | -3.12 (0.34)          | -3.7 (-4.7-1.07)                                     | .48                 | .35                 |         | 0.79 (0.62-0.96)  |            |
| Shallow anterior chamber                | 17 of 26                    | -3.59 (0.37)          | -4.7 (-4.7-2.7)                                      | -2.27 (0.49)          | -2 (-4.7-0.34)                                       | .043 <sup>a</sup>   | .045 <sup>a</sup>   |         | 0.6 (0.45-0.77)   |            |

**Note:**—GSW indicates gunshot wound; IOFB, intraocular foreign body; asterisk, clinical variables without interobserver agreement values; Q<sub>1</sub>, quartile 1; Q<sub>3</sub>, quartile 3.

<sup>a</sup> Statistical significance ( $P < .05$ ).

**On-line Table 3: Visual acuity conversion chart**

| VA                  | logMAR Units | VA     | logMAR Units |
|---------------------|--------------|--------|--------------|
| No light perception | -4.70        | 20/100 | -0.70        |
| Light perception    | -3.70        | 20/80  | -0.60        |
| Hand motion         | -2.70        | 20/60  | -0.48        |
| Finger counting     | -1.40        | 20/50  | -0.40        |
| 20/800              | -1.60        | 20/40  | -0.30        |
| 20/400              | -1.30        | 20/30  | -0.18        |
| 20/200              | -1.00        | 20/20  | 0.00         |
